# Supplementary material for: The dominant role of sunlight in degrading winter dissolved organic matter from a thermokarst lake in a subarctic peatland
Source: Copernicus journal article supplement (doi:10.5194/bg-2022-26), 2022-01-28
Supplement: Supplementary file 1 [file bg-2022-26-supplement.pdf]

### Note on the calculation of the bacterial production (BP)

Leucine incorporation rates were calculated using Eq. (1):

$$Leu_{inc} = \frac{DPM \times 4.5 \times 10^{-13}}{SA \times t \times V}, \quad (1)$$

5 where  $Leu_{inc}$  is the sample leucine incorporation in mmol leucine  $L^{-1} h^{-1}$ , DPM is the sample corrected DPM,  $4.5 \times 10^{-13}$  is a constant in Ci  $DPM^{-1}$ , SA is the specific activity of leucine in Ci  $mmol^{-1}$ , t is the incubation time in hours, and V is the volume of the sample in litres. BP was expressed as the production of carbon biomass calculated from leucine incorporation using the coefficients and Eq. (2) from Simon and Azam (1989):

$$BP = Leu_{inc} \times 131.2 \div 0.073 \times 0.86 \times ID \times 10^3, \quad (2)$$

10 where BP is the bacterial carbon production in  $\mu gC L^{-1} h^{-1}$ ,  $Leu_{inc}$  is the sample leucine incorporation in mmol leucine  $L^{-1} h^{-1}$ , 131.2 is the molecular weight of leucine in  $g mol^{-1}$ , 0.073 is the fraction of leucine in proteins, 0.86 is the fraction of carbon in proteins, and ID is the isotope dilution value. As ID was not specifically estimated, the conservative value of 1 was used as advised by Kirchman (2001).

15 **Table S1. Additional limnological data from the winter sampling in 2016, including temperature, dissolved oxygen (DO),**  
**pH, conductivity, total phosphorus (TP), total nitrogen (TN), total iron (Fe), dissolved organic carbon (DOC), DOM**  
**absorption coefficient at 320 nm ( $a_{320}$ ), DOM specific UV absorbance at 254 nm ( $SUVA_{254}$ ), DOM spectral slope between**  
**275 and 295 nm ( $S_{285}$ ), total fluorescence of DOM ( $F_{tot}$ ), and the amount of fluorescence for each of the five components**  
**retrieved by PARAFAC (C1-C5). Values are given at three depths under the ice cover as sampled on 19 March (over a**  
**total water column of about 1.7 m). DOM characteristics of the water collected for the experiment at the surface on 24**  
**March are also given for comparison. Temperature, DO, pH and conductivity profiles were obtained using a**  
**20 multiparameter probe (Hydrolab DSSX, OTT HydroMet GmbH, Germany; temperature  $\pm 0.1^\circ\text{C}$ , polarographic DO  $\pm$**   
**0.6 mg L<sup>-1</sup>, pH  $\pm 0.2$  units, conductivity  $\pm 0.001$  mS cm<sup>-1</sup>). Water for the quantification of DOC and DOM properties**  
**was filtered in the field on pre-rinsed 0.2- $\mu\text{m}$  cellulose acetate filters. TP, TN, cations and DOC were analysed as**  
**described in (Bouchard et al., 2015). Values of  $a_{320}$ ,  $SUVA_{254}$  and  $S_{285}$  were computed from 250-800 nm absorbance**  
**25 spectra, while the five components of fluorescing DOM were extracted using the PARAFAC model (described in the**  
**method section of the article).**

|                                                     | Depth under the ice cover (m) |        |              |             |
|-----------------------------------------------------|-------------------------------|--------|--------------|-------------|
|                                                     | 19 March                      |        |              | 24 March    |
|                                                     | 0 (surface)                   | 0.5    | 1.3 (bottom) | 0 (surface) |
| Temperature ( $^\circ\text{C}$ )                    | 0.5                           | 0.6    | 1.9          | NA          |
| DO (mg L <sup>-1</sup> )                            | 0.0                           | 0.0    | 0.0          | NA          |
| pH                                                  | 5.00                          | 5.00   | 5.10         | NA          |
| Conductivity ( $\mu\text{S cm}^{-1}$ )              | 69                            | 69     | 91           | NA          |
| TP ( $\mu\text{g P L}^{-1}$ )                       | 11                            | 21     | 31           | NA          |
| TN (mg N L <sup>-1</sup> )                          | 1.25                          | 1.35   | 1.44         | NA          |
| Fe (mg L <sup>-1</sup> )                            | 3.0                           | 3.1    | 3.9          | NA          |
| DOC (mgC L <sup>-1</sup> )                          | 18.3                          | 19.5   | 20.9         | 19.2        |
| $a_{320}$ (m <sup>-1</sup> )                        | 142                           | 157    | 169          | 144         |
| $SUVA_{254}$ (L mgC <sup>-1</sup> m <sup>-1</sup> ) | 6.78                          | 6.98   | 6.85         | 6.51        |
| $S_{285}$ (nm <sup>-1</sup> )                       | 0.0111                        | 0.0109 | 0.0105       | 0.0110      |
| $F_{tot}$ (RU)                                      | 4.9                           | 5.5    | 5.2          | 5.0         |
| C1 (RU)                                             | 2.0                           | 2.1    | 2.0          | 1.9         |
| C2 (RU)                                             | 1.4                           | 1.6    | 1.6          | 1.4         |
| C3 (RU)                                             | 0.6                           | 0.6    | 0.6          | 0.6         |
| C4 (RU)                                             | 0.5                           | 0.4    | 0.3          | 0.4         |
| C5 (RU)                                             | 0.6                           | 0.7    | 0.8          | 0.7         |

**Table S2. Description of the five fluorescent components identified with the PARAFAC model. Secondary peaks are indicated in parentheses. The comparison with the literature was done on Openfluor using the criteria of the Tucker congruence coefficient (TCC).**

| PARAFAC component | Excitation peaks (nm) | Emission peaks (nm) | Matching score                | Examples of matching in literature                                                                                                                                                                                   | Attributed characteristics                |
|-------------------|-----------------------|---------------------|-------------------------------|----------------------------------------------------------------------------------------------------------------------------------------------------------------------------------------------------------------------|-------------------------------------------|
| C1                | < 250<br>(340)        | 478                 | TCC > 0.95<br>> 30 models     | - Williams et al., 2010: C1, streams<br>- Osburn et al., 2016: C1, coastal and estuarine waters<br>- Yamashita et al., 2010: C1, subtropical wetlands                                                                | Ubiquitous humic-like, terrestrial origin |
| C2                | < 250<br>(310)        | 432                 | 0.90 < TCC < 0.95<br>2 models | -Williams et al., 2010: C2, bio-refractory<br>- S ndergaard et al., 2003: C1, wetland and forest drainage waters                                                                                                     | Humic-like terrestrial origin             |
| C3                | < 250<br>(300, 390)   | 512                 | TCC > 0.95<br>> 30 models     | - Osburn et al., 2012: C1, estuaries<br>- Stedmon et al., 2007: C2, seawater<br>- Graeber et al., 2012: C2, agricultural, forested and wetland catchments<br>- Kida et al., 2019: C4, Antarctic water, autochthonous | Humic-like, presumable terrestrial origin |
| C4                | 270                   | 406                 | 0.90 < TCC < 0.95<br>1 model  | - Dainard et al., 2015: C5, Beaufort Sea, photodegradable                                                                                                                                                            | Humic-like                                |
| C5                | 280<br>(350)          | 444                 | TCC > 0.95<br>4 models        | - Lapierre and del Giorgio, 2014: C3, boreal region, extremely photodegradable<br>- Murphy et al., 2018 : C2, ubiquitous and photodegradable                                                                         | Humic-like                                |

**Table S3. Summary of the ANOVAs showing the effects of the full factorial design, including factors Time, Light and Bacteria for all variables of interest.**

| Source of variation           | df | F ratio | P        |
|-------------------------------|----|---------|----------|
| <b>(a) DIC</b>                |    |         |          |
| Time                          | 3  | 13.3    | < 0.0001 |
| Light                         | 1  | 756.4   | < 0.0001 |
| Time*Light                    | 3  | 15.0    | < 0.0001 |
| Bacteria                      | 1  | 0.4     | 0.5195   |
| Time*Bacteria                 | 3  | 4.3     | 0.0117   |
| Light*Bacteria                | 1  | 17.2    | 0.0002   |
| Time*Light*Bacteria           | 3  | 1.7     | 0.1916   |
| <b>(b) DOC</b>                |    |         |          |
| Time                          | 3  | 232.1   | < 0.0001 |
| Light                         | 1  | 3215.8  | < 0.0001 |
| Time*Light                    | 3  | 165.0   | < 0.0001 |
| Bacteria                      | 1  | 6.0     | 0.0201   |
| Time*Bacteria                 | 3  | 3.9     | 0.0172   |
| Light*Bacteria                | 1  | 44.7    | < 0.0001 |
| Time*Light*Bacteria           | 3  | 5.2     | 0.0050   |
| <b>(c) a<sub>320</sub></b>    |    |         |          |
| Time                          | 3  | 124.3   | < 0.0001 |
| Light                         | 1  | 2333.8  | < 0.0001 |
| Time*Light                    | 3  | 106.4   | < 0.0001 |
| Bacteria                      | 1  | 15.5    | 0.0004   |
| Time*Bacteria                 | 3  | 2.9     | 0.0499   |
| Light*Bacteria                | 1  | 9.0     | 0.0052   |
| Time*Light*Bacteria           | 3  | 4.9     | 0.0062   |
| <b>(d) S<sub>285</sub></b>    |    |         |          |
| Time                          | 3  | 53.0    | < 0.0001 |
| Light                         | 1  | 2127.0  | < 0.0001 |
| Time*Light                    | 3  | 51.0    | < 0.0001 |
| Bacteria                      | 1  | 6.3     | 0.0177   |
| Time*Bacteria                 | 3  | 1.7     | 0.1796   |
| Light*Bacteria                | 1  | 6.1     | 0.0189   |
| Time*Light*Bacteria           | 3  | 2.2     | 0.1117   |
| <b>(e) SUVA<sub>254</sub></b> |    |         |          |
| Time                          | 3  | 16.0    | < 0.0001 |
| Light                         | 1  | 13.8    | 0.0008   |
| Time*Light                    | 3  | 28.3    | < 0.0001 |
| Bacteria                      | 1  | 60.2    | < 0.0001 |
| Time*Bacteria                 | 3  | 5.0     | 0.0059   |
| Light*Bacteria                | 1  | 84.3    | < 0.0001 |
| Time*Light*Bacteria           | 3  | 9.1     | 0.0002   |
| <b>(f) F<sub>tot</sub></b>    |    |         |          |
| Time                          | 3  | 274.2   | < 0.0001 |
| Light                         | 1  | 21037.9 | < 0.0001 |
| Time*Light                    | 3  | 689.0   | < 0.0001 |
| Bacteria                      | 1  | 147.9   | < 0.0001 |
| Time*Bacteria                 | 3  | 1.9     | 0.1504   |
| Light*Bacteria                | 1  | 143.3   | < 0.0001 |
| Time*Light*Bacteria           | 3  | 1.6     | 0.2084   |
| <b>(g) C1</b>                 |    |         |          |
| Time                          | 3  | 57.6    | < 0.0001 |
| Light                         | 1  | 2983.0  | < 0.0001 |
| Time*Light                    | 3  | 129.9   | < 0.0001 |
| Bacteria                      | 1  | 36.1    | < 0.0001 |
| Time*Bacteria                 | 3  | 2.1     | 0.1143   |
| Light*Bacteria                | 1  | 37.9    | < 0.0001 |
| Time*Light*Bacteria           | 3  | 1.4     | 0.2649   |

35 **Table S3. Continued.**

| Source of variation      | df | F ratio | P        |
|--------------------------|----|---------|----------|
| <b>(h) C2</b>            |    |         |          |
| Time                     | 3  | 102.1   | < 0.0001 |
| Light                    | 1  | 3253.4  | < 0.0001 |
| Time*Light               | 3  | 228.7   | < 0.0001 |
| Bacteria                 | 1  | 69.8    | < 0.0001 |
| Time*Bacteria            | 3  | 2.0     | 0.1368   |
| Light*Bacteria           | 1  | 147.0   | < 0.0001 |
| Time*Light*Bacteria      | 3  | 2.2     | 0.1064   |
| <b>(i) C3</b>            |    |         |          |
| Time                     | 3  | 237.1   | < 0.0001 |
| Light                    | 1  | 35475.3 | < 0.0001 |
| Time*Light               | 3  | 583.0   | < 0.0001 |
| Bacteria                 | 1  | 20.4    | < 0.0001 |
| Time*Bacteria            | 3  | 0.8     | 0.5099   |
| Light*Bacteria           | 1  | 8.8     | 0.0057   |
| Time*Light*Bacteria      | 3  | 5.4     | 0.0042   |
| <b>(j) C4</b>            |    |         |          |
| Time                     | 3  | 89.9    | < 0.0001 |
| Light                    | 1  | 187.3   | < 0.0001 |
| Time*Light               | 3  | 46.1    | < 0.0001 |
| Bacteria                 | 1  | 39.5    | < 0.0001 |
| Time*Bacteria            | 3  | 0.8     | 0.4884   |
| Light*Bacteria           | 1  | 69.1    | < 0.0001 |
| Time*Light*Bacteria      | 3  | 2.9     | 0.0510   |
| <b>(k) C5</b>            |    |         |          |
| Time                     | 3  | 17.7    | < 0.0001 |
| Light                    | 1  | 5731.8  | < 0.0001 |
| Time*Light               | 3  | 77.5    | < 0.0001 |
| Bacteria                 | 1  | 0.1     | 0.8325   |
| Time*Bacteria            | 3  | 1.8     | 0.1734   |
| Light*Bacteria           | 1  | 2.6     | 0.1180   |
| Time*Light*Bacteria      | 3  | 1.4     | 0.2657   |
| <b>(l) BA</b>            |    |         |          |
| Time                     | 3  | 42.5    | < 0.0001 |
| Light                    | 1  | 352.8   | < 0.0001 |
| Time*Light               | 3  | 36.8    | < 0.0001 |
| Bacteria                 | 1  | 68.1    | < 0.0001 |
| Time*Bacteria            | 3  | 69.7    | < 0.0001 |
| Light*Bacteria           | 1  | 93.5    | < 0.0001 |
| Time*Light*Bacteria      | 3  | 46.2    | < 0.0001 |
| <b>(n) BP</b>            |    |         |          |
| Time                     | 3  | 1.3     | 0.2652   |
| Light                    | 1  | 39.0    | < 0.0001 |
| Time*Light               | 3  | 0.1     | 0.8297   |
| Bacteria                 | 1  | 77.6    | < 0.0001 |
| Time*Bacteria            | 3  | 10.3    | 0.0058   |
| Light*Bacteria           | 1  | 0.8     | 0.3872   |
| Time*Light*Bacteria      | 3  | 1.7     | 0.2143   |
| <b>(o) Normalized BP</b> |    |         |          |
| Time                     | 3  | 13.5    | 0.0023   |
| Light                    | 1  | 0.1     | 0.8281   |
| Time*Light               | 3  | 0.2     | 0.6648   |
| Bacteria                 | 1  | 33.8    | < 0.0001 |
| Time*Bacteria            | 3  | 7.0     | 0.0184   |
| Light*Bacteria           | 1  | 0.1     | 0.8198   |
| Time*Light*Bacteria      | 3  | 5.9     | 0.0285   |

37 **Table S4. Summary of the ANOVAs showing the effects of the full factorial design including factors Time and**  
 38 **Treatment, for all variables of interest.**

| Source of variation     | df | F ratio | P-value  |
|-------------------------|----|---------|----------|
| (a) DIC                 |    |         |          |
| Time                    | 3  | 10.1    | < 0.0001 |
| Treatment               | 4  | 266.0   | < 0.0001 |
| Time*Treatment          | 12 | 6.9     | < 0.0001 |
| (b) DOC                 |    |         |          |
| Time                    | 3  | 244.7   | < 0.0001 |
| Treatment               | 4  | 981.7   | < 0.0001 |
| Time*Treatment          | 12 | 62.5    | < 0.0001 |
| (c) a <sub>320</sub>    |    |         |          |
| Time                    | 3  | 133.9   | < 0.0001 |
| Treatment               | 4  | 870.4   | < 0.0001 |
| Time*Treatment          | 12 | 45.5    | < 0.0001 |
| (d) S <sub>285</sub>    |    |         |          |
| Time                    | 3  | 49.5    | < 0.0001 |
| Treatment               | 4  | 666.7   | < 0.0001 |
| Time*Treatment          | 12 | 21.2    | < 0.0001 |
| (e) SUVA <sub>254</sub> |    |         |          |
| Time                    | 3  | 15.1    | < 0.0001 |
| Treatment               | 4  | 45.3    | < 0.0001 |
| Time*Treatment          | 12 | 13.9    | < 0.0001 |
| (f) F <sub>tot</sub>    |    |         |          |
| Time                    | 3  | 359.4   | < 0.0001 |
| Treatment               | 4  | 6588.4  | < 0.0001 |
| Time*Treatment          | 12 | 258.7   | < 0.0001 |
| (g) C1                  |    |         |          |
| Time                    | 3  | 74.1    | < 0.0001 |
| Treatment               | 4  | 959.0   | < 0.0001 |
| Time*Treatment          | 12 | 50.0    | < 0.0001 |
| (h) C2                  |    |         |          |
| Time                    | 3  | 144.9   | < 0.0001 |
| Treatment               | 4  | 1122.4  | < 0.0001 |
| Time*Treatment          | 12 | 88.3    | < 0.0001 |
| (i) C3                  |    |         |          |
| Time                    | 3  | 198.8   | < 0.0001 |
| Treatment               | 4  | 9804.6  | < 0.0001 |
| Time*Treatment          | 12 | 191.7   | < 0.0001 |
| (j) C4                  |    |         |          |
| Time                    | 3  | 174.4   | < 0.0001 |
| Treatment               | 4  | 99.8    | < 0.0001 |
| Time*Treatment          | 12 | 19.8    | < 0.0001 |
| (k) C5                  |    |         |          |
| Time                    | 3  | 15.6    | < 0.0001 |
| Treatment               | 4  | 1778.0  | < 0.0001 |
| Time*Treatment          | 12 | 27.7    | < 0.0001 |
| (l) BA                  |    |         |          |
| Time                    | 3  | 43.4    | < 0.0001 |
| Treatment               | 4  | 152.8   | < 0.0001 |
| Time*Treatment          | 12 | 38.0    | < 0.0001 |
| (m) BP                  |    |         |          |
| Time                    | 3  | 0.5     | 0.5127   |
| Treatment               | 4  | 36.6    | < 0.0001 |
| Time*Treatment          | 12 | 3.3     | 0.0332   |
| (n) Normalized BP       |    |         |          |
| Time                    | 3  | 14.4    | 0.0012   |
| Treatment               | 4  | 10.4    | 0.0001   |
| Time*Treatment          | 12 | 4.1     | 0.0151   |

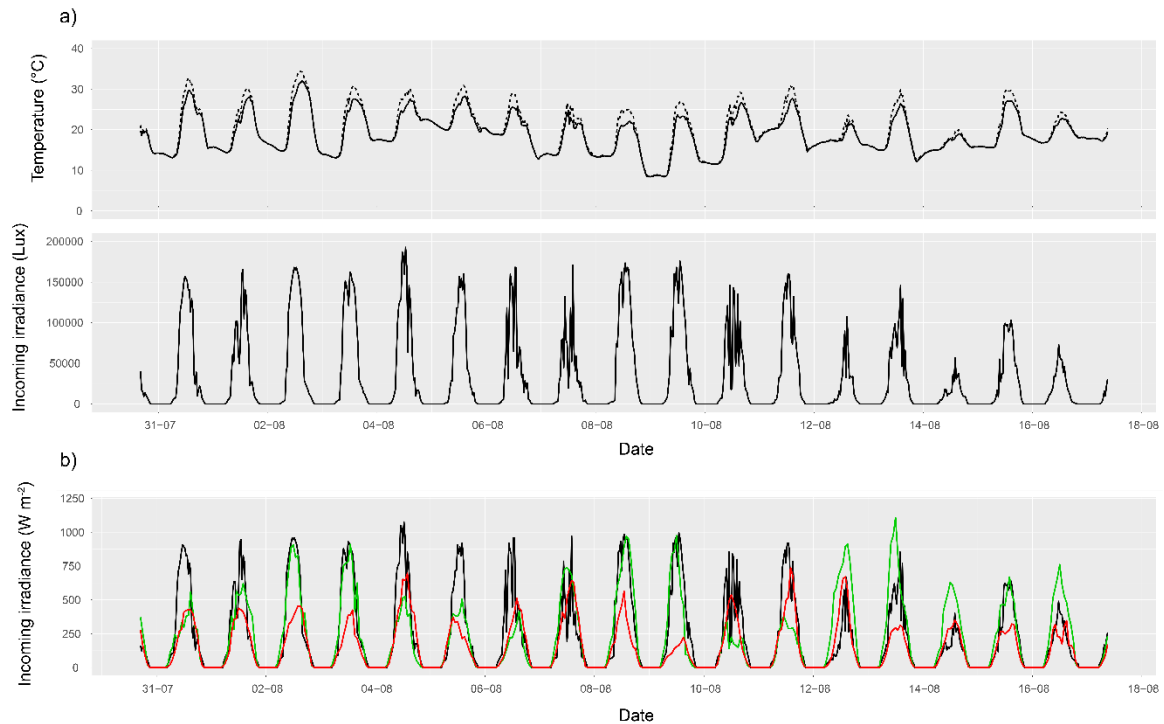

39  
 40 **Figure S1. Data from the Pendant sensors installed in the incubation tray (a). The top graph is showing the temperature**  
 41 **of the sensor exposed to sunlight (light treatment, dashed line) or wrapped in black tape (dark treatment, continuous**  
 42 **line). The bottom graph presents incoming irradiance (in Lux) as a relative measurement of incoming irradiance. As**  
 43 **the incubation was conducted outside, the water temperature and irradiance received by the samples depended on local**  
 44 **meteorological conditions. The incoming irradiance (b) received at Quebec City during the experimental period (black**  
 45 **line) is compared to irradiance received at the nearby village of Whapmagoostui- Kuujuarapik (green line – mean over**  
 46 **2015 and 2016; CEN, 2020a) and at the study site SAS (red line – mean over 2017, 2018 and 2019; CEN, 2020b).**  
 47 **Irradiance was not yet available at SAS in August 2016. Irradiance data at Quebec City come from Laval University**  
 48 **station, with the three first days reconstructed from Pendant data as explained in the methods section.**

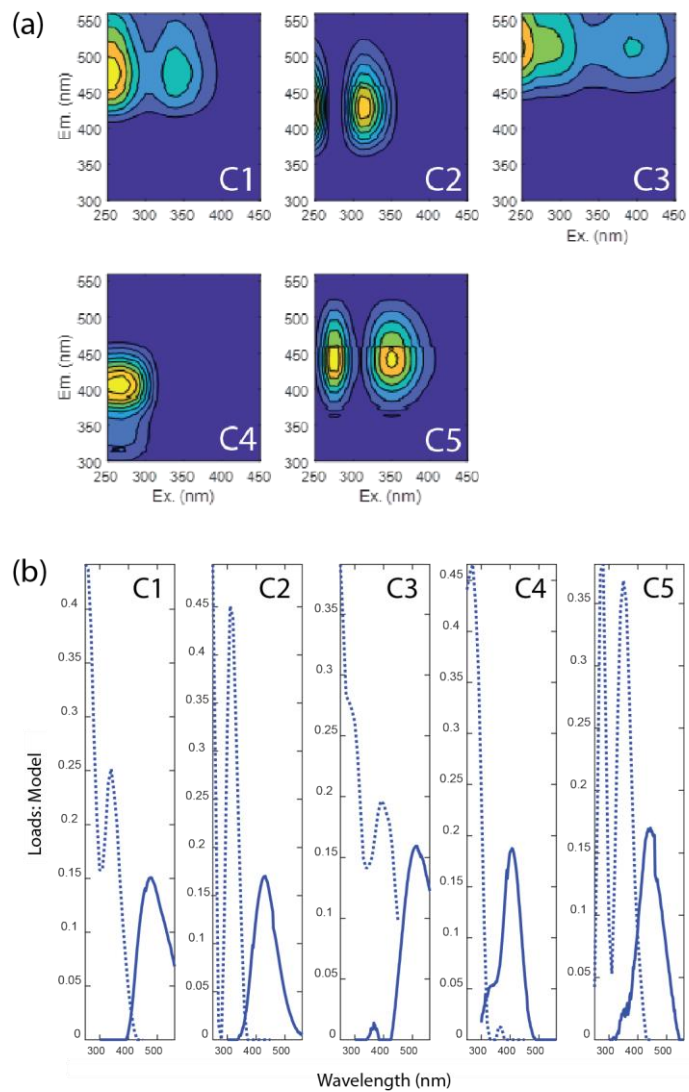

49  
50  
51

**Figure S2. The fingerprints (a) and loadings (b) of the five fluorescent components identified by the PARAFAC model (C1-C5). In (b), dashed and full lines respectively represent excitation and emission spectra.**



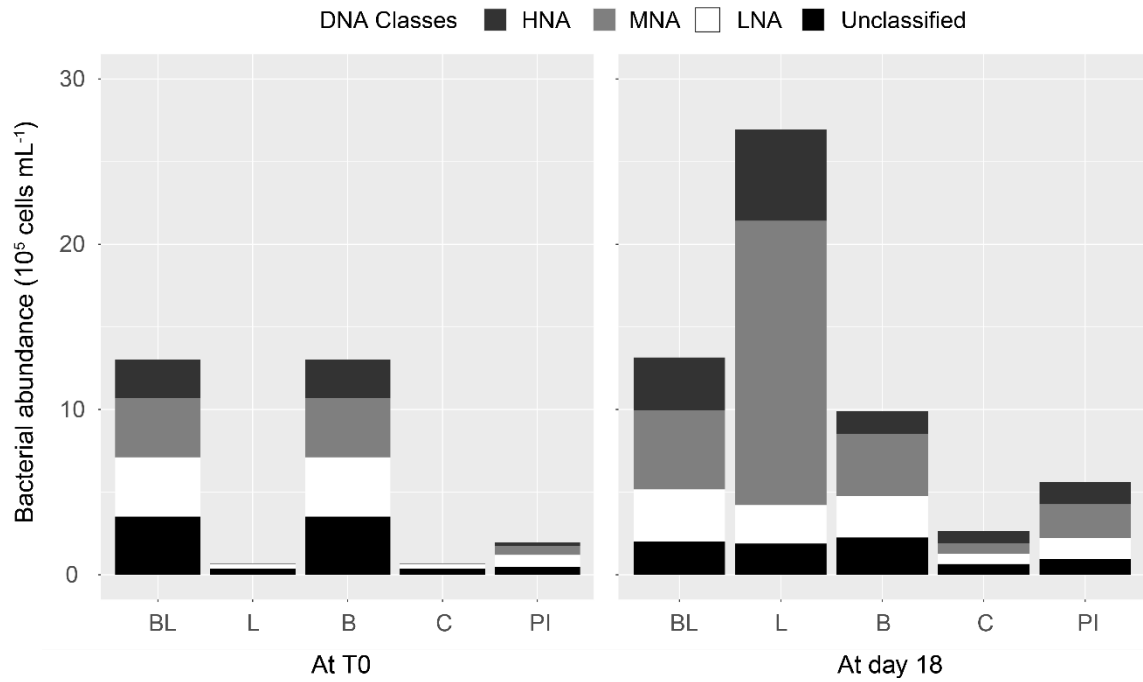

52  
53  
54  
55

**Figure S3. Repartition of the total bacterial abundance (BA) among the low (LNA), medium (MNA) and high (HNA) DNA populations identified by cytometric gating. Unclassified bacteria that did not belong to any of these three populations are also shown. Refer to Figure S4 for gating examples.**

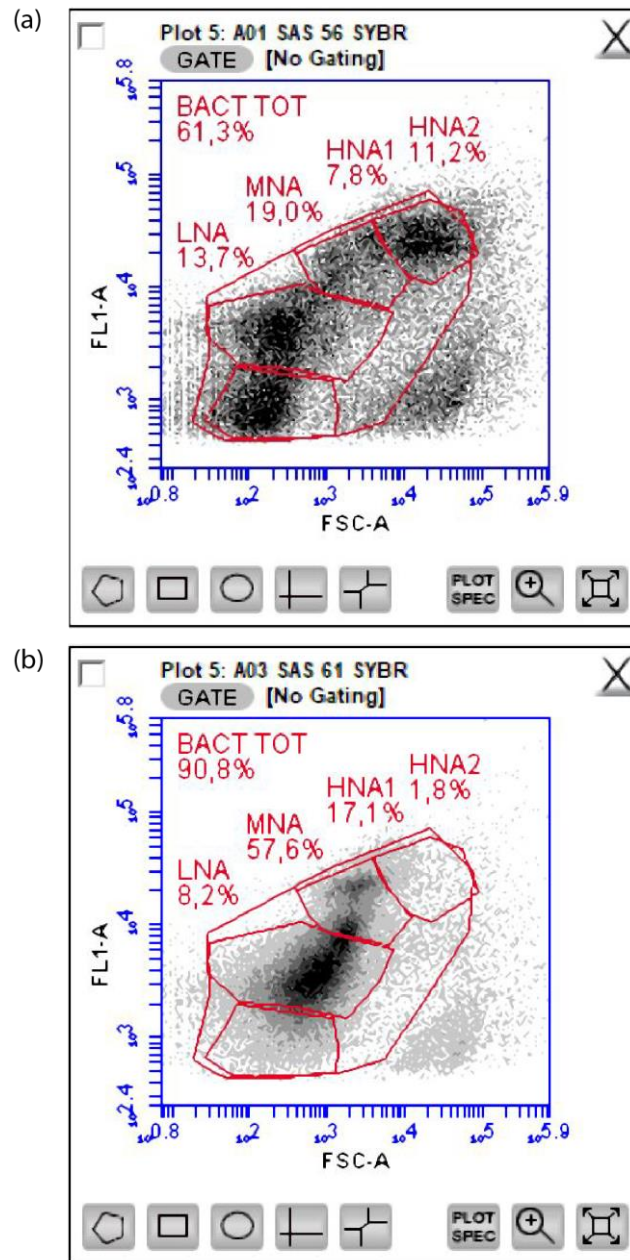

56  
57 **Figure S4.** Examples of the cytometric gating used for the extraction of the bacterial abundance. Low (LNA), medium  
58 (MNA) and high (HNA) DNA populations were defined as massive group of cells discriminated on the strength of the  
59 green fluorescence signal. Note that HNA = HNA1 + HNA2. The cytogram (a) is from a sample of the BL treatment at  
60 18 days. The cytogram (b) shows the two massive populations that emerged in samples of the L treatment after 18 days  
61 of incubation.

## References cited

- Bouchard, F., Laurion, I., Preskienis, V., Fortier, D., Xu, X. and Whiticar, M. J.: Modern to millennium-old greenhouse gases emitted from ponds and lakes of the Eastern Canadian Arctic (Bylot Island, Nunavut), *Biogeosciences*, 12(23), 7279–7298, doi:10.5194/bg-12-7279-2015, 2015.
- Centre for northern studies (CEN): Climate station data from Whapmagoostui-Kuujuarapik Region in Nunavik, Quebec, Canada, v. 1.5 (1987-2019). Nordicana D4, 2020a.
- Centre for northern studies (CEN): Unpublished data, 2020b.
- Dainard, P. G., Guéguen, C., McDonald, N. and Williams, W. J.: Photobleaching of fluorescent dissolved organic matter in Beaufort Sea and North Atlantic Subtropical Gyre, *Mar. Chem.*, 177, 630–637, doi:10.1016/j.marchem.2015.10.004, 2015.
- Graeber, D., Gelbrecht, J., Pusch, M. T., Anlanger, C. and von Schiller, D.: Agriculture has changed the amount and composition of dissolved organic matter in Central European headwater streams, *Sci. Total Environ.*, 438, 435–446, doi:10.1016/j.scitotenv.2012.08.087, 2012.
- Kida, M., Kojima, T., Tanabe, Y., Hayashi, K., Kudoh, S., Maie, N. and Fujitake, N.: Origin, distributions, and environmental significance of ubiquitous humic-like fluorophores in Antarctic lakes and streams, *Water Res.*, 163, 114901, doi:10.1016/j.watres.2019.114901, 2019.
- Kirchman, D.: Measuring bacterial biomass production and growth rates from leucine incorporation in natural aquatic environments, in *Methods in Microbiology*, vol. 30, edited by J. H. Paul, pp. 227–237, Academic Press. [online] Available from: <https://www.sciencedirect.com/science/article/pii/S0580951701300478>, 2001.
- Lapierre, J.-F. and del Giorgio, P. A.: Partial coupling and differential regulation of biologically and photochemically labile dissolved organic carbon across boreal aquatic networks, *Biogeosciences*, 11, 5969–5985, doi:10.5194/bg-11-5969-2014, 2014.
- Murphy, K. R., Timko, S. A., Gonsior, M., Powers, L. C., Wunsch, U. J. and Stedmon, C. A.: Photochemistry Illuminates Ubiquitous Organic Matter Fluorescence Spectra, *Environ. Sci. Technol.*, 52, 11243–11250, doi:10.1021/acs.est.8b02648, 2018.
- Osburn, C. L., Handsel, L. T., Mikan, M. P., Paerl, H. W. and Montgomery, M. T.: Fluorescence Tracking of Dissolved and Particulate Organic Matter Quality in a River-Dominated Estuary, *Environ. Sci. Technol.*, 46, 8628–8636, doi:10.1021/es3007723, 2012.
- Osburn, C. L., Boyd, T. J., Montgomery, M. T., Bianchi, T. S., Coffin, R. B. and Paerl, H. W.: Optical Proxies for Terrestrial Dissolved Organic Matter in Estuaries and Coastal Waters, *Front. Mar. Sci.*, 2(127), doi:10.3389/fmars.2015.00127, 2016.
- Simon, M. and Azam, F.: Protein content and protein synthesis rates of planktonic marine bacteria, *Mar. Ecol. Prog. Ser.*, 51, 201–213, 1989.
- Søndergaard, M., Stedmon, C. A. and Borch, N. H.: Fate of terrigenous dissolved organic matter (DOM) in estuaries: Aggregation and bioavailability, *Ophelia*, 57(3), 161–176, doi:10.1080/00785236.2003.10409512, 2003.
- Stedmon, C. A., Thomas, D. N., Granskog, M., Kaartokallio, H., Papadimitriou, S. and Kuosa, H.: Characteristics of Dissolved Organic Matter in Baltic Coastal Sea Ice: Allochthonous or Autochthonous Origins?, *Environ. Sci. Technol.*, 41(21), 7273–7279, doi:10.1021/es071210f, 2007.
- Williams, C. J., Yamashita, Y., Wilson, H. F., Jaffe, R. and Xenopoulos, M. A.: Unraveling the role of land use

and microbial activity in shaping dissolved organic matter characteristics in stream ecosystems, *Limnol. Oceanogr.*, 55(3), 1159–1171, doi:10.4319/lo.2010.55.3.1159, 2010.

Yamashita, Y., Scinto, L. J., Maie, N. and Jaffé, R.: Dissolved Organic Matter Characteristics Across a Subtropical Wetland's Landscape: Application of Optical Properties in the Assessment of Environmental Dynamics, *Ecosystems*, 13(7), 1006–1019, doi:10.1007/s10021-010-9370-1, 2010.
